# Supplementary material for: Reliability and Validity of Non-Instrumental Clinical Assessments for Adults with Oropharyngeal Dysphagia: A Systematic Review
Source: MDPI journal article supplement (doi:10.3390/jcm12020721), 2023-01-16
Supplement: s1 [file s1]

**Supplementary File S5. Reliability and Validity of Non-instrumental Clinical Assessments for Adults with Oropharyngeal Dysphagia: A systematic review.**

**Methodological quality of included studies based on QualSyst critical appraisal tool by Kmet et al. 2004 [1]**

[illegible]

| QualSyst Item                      | Question/objective sufficiently described | Study design evident and appropriate? | Method of subject/ comparison group selection or source of information/ input variables described | Subject and comparison group, if applicable characteristics sufficiently described? | Outcome and if applicable exposure measures well defined and robust to measurement/ | Sample size appropriate? | Analytic methods described/justified and appropriate | Some estimate of variance is reported for the main results | Results reported in sufficient detail? | Conclusions supported by the results? | Methodological Quality <sup>1</sup> |
|------------------------------------|-------------------------------------------|---------------------------------------|---------------------------------------------------------------------------------------------------|-------------------------------------------------------------------------------------|-------------------------------------------------------------------------------------|--------------------------|------------------------------------------------------|------------------------------------------------------------|----------------------------------------|---------------------------------------|-------------------------------------|
| Reference                          |                                           |                                       |                                                                                                   |                                                                                     |                                                                                     |                          |                                                      |                                                            |                                        |                                       |                                     |
| Kothari et al. 2021 [16]           | 2                                         | 2                                     | 2                                                                                                 | 2                                                                                   | 2                                                                                   | 2                        | 2                                                    | 2                                                          | 2                                      | 2                                     | Strong 100%                         |
| Kwon et al. 2019 [17]              | 2                                         | 2                                     | 2                                                                                                 | 2                                                                                   | 2                                                                                   | 2                        | 2                                                    | 2                                                          | 2                                      | 2                                     | Strong 100%                         |
| Lambert et al. 2003 [18]           | 2                                         | 2                                     | 2                                                                                                 | 2                                                                                   | 2                                                                                   | 2                        | 2                                                    | 2                                                          | 2                                      | 2                                     | Strong 90%                          |
| Lambert et al. 2005 [19]           | 2                                         | 2                                     | 2                                                                                                 | 2                                                                                   | 2                                                                                   | 2                        | 0                                                    | 2                                                          | 2                                      | 2                                     | Strong 90%                          |
| Lambert et al. 2006 [20]           | 2                                         | 2                                     | 2                                                                                                 | 2                                                                                   | 2                                                                                   | 2                        | 1                                                    | 2                                                          | 2                                      | 2                                     | Strong 95%                          |
| McMicken & Muzzy 2009a [21]        | 2                                         | 2                                     | 2                                                                                                 | 2                                                                                   | 2                                                                                   | 2                        | 2                                                    | 2                                                          | 2                                      | 2                                     | Strong 100%                         |
| McMicken & Muzzy 2009b [22]        | 2                                         | 2                                     | 2                                                                                                 | 2                                                                                   | 2                                                                                   | 2                        | 1                                                    | 2                                                          | 2                                      | 2                                     | Strong 95%                          |
| McMicken et al. 2010 [23]          | 2                                         | 2                                     | 2                                                                                                 | 2                                                                                   | 2                                                                                   | 2                        | 2                                                    | 2                                                          | 2                                      | 2                                     | Strong 100%                         |
| Mitani et al. 2018 [24]            | 2                                         | 2                                     | 2                                                                                                 | 2                                                                                   | 2                                                                                   | 2                        | 2                                                    | 2                                                          | 2                                      | 2                                     | Strong 100%                         |
| Nordio et al. 2018 [25]            | 2                                         | 2                                     | 2                                                                                                 | 2                                                                                   | 2                                                                                   | 2                        | 1                                                    | 1                                                          | 2                                      | 2                                     | Strong 90%                          |
| Oliveira et al. 2015 [26]          | 2                                         | 2                                     | 2                                                                                                 | 2                                                                                   | 2                                                                                   | 2                        | 2                                                    | 2                                                          | 2                                      | 2                                     | Strong 100%                         |
| Oliveira-Kumakura et al. 2018 [27] | 2                                         | 2                                     | 2                                                                                                 | 2                                                                                   | 2                                                                                   | 2                        | 2                                                    | 2                                                          | 2                                      | 2                                     | Strong 100%                         |
| Oliveira-Kumakura et al. 2019 [28] | 2                                         | 2                                     | 2                                                                                                 | 2                                                                                   | 2                                                                                   | 2                        | 2                                                    | 2                                                          | 2                                      | 2                                     | Strong 100%                         |
| Sellers et al. 2013 [29]           | 2                                         | 2                                     | 2                                                                                                 | 2                                                                                   | 2                                                                                   | 2                        | 2                                                    | 2                                                          | 2                                      | 2                                     | Strong 100%                         |
| Sheppard et al. 2014 [30]          | 2                                         | 2                                     | 2                                                                                                 | 2                                                                                   | 2                                                                                   | 2                        | 2                                                    | 2                                                          | 2                                      | 2                                     | Strong 100%                         |
| Steele et al. 2018 [31]            | 2                                         | 2                                     | 1                                                                                                 | 2                                                                                   | 2                                                                                   | 2                        | 2                                                    | 2                                                          | 2                                      | 2                                     | Strong 95%                          |
| Todaro et al. 2021 [32]            | 2                                         | 2                                     | 2                                                                                                 | 2                                                                                   | 2                                                                                   | 2                        | 2                                                    | 2                                                          | 2                                      | 2                                     | Strong 100%                         |
| Uhm et al. 2019 [33]               | 2                                         | 2                                     | 2                                                                                                 | 2                                                                                   | 2                                                                                   | 2                        | 1                                                    | 2                                                          | 2                                      | 2                                     | Strong 95%                          |

<sup>1</sup> Methodological quality: strong > 80%; good 60–79%; adequate 50–59%; poor < 50%

## References

1. Kmet, L.M., L.S. Cook, and R.C. Lee, *Standard quality assessment criteria for evaluating primary research papers from a variety of fields*. 2004.
2. Antonios, N., et al., *Analysis of a Physician Tool for Evaluating Dysphagia on an Inpatient Stroke Unit: The Modified Mann Assessment of Swallowing Ability*. Journal of Stroke and Cerebrovascular Diseases, 2010. **19(1)**: p. 49-57.
3. Borders, J.C., et al., *Objective and Subjective Clinical Swallowing Outcomes via Telehealth: Reliability in Outpatient Clinical Practice*. American Journal of Speech-Language Pathology, 2021. **30**: p. 598-608.
4. Carnaby, G.D. and M.A. Crary, *Development and validation of a cancer-specific swallowing assessment tool: MASA-C*. Supportive Care in Cancer, 2014. **22(3)**: p. 595-602.
5. Chun, M.H., D. Kim, and M.C. Chang, *Comparison of dysphagia outcomes between rostral and caudal lateral medullary infarct patients*. International Journal of Neuroscience, 2017. **127(11)**: p. 965-970.
6. Crary, M.A., G.D. Carnaby Mann, and M.E. Groher, *Initial psychometric assessment of a functional oral intake scale for dysphagia in stroke patients*. Archives of Physical Medicine and Rehabilitation, 2005. **86(8)**: p. 1516-1520.
7. Dungan, S., et al., *Comparative Validity of the American Speech-Language-Hearing Association's National Outcomes Measurement System, Functional Oral Intake Scale, and G-Codes to Mann Assessment of Swallowing Ability Scores for Dysphagia*. American Journal of Speech-Language Pathology, 2019. **28(2)**: p. 424-429.
8. Everton, L.F., et al., *Psychometric assessment and validation of the dysphagia severity rating scale in stroke patients*. Scientific Reports, 2020. **10(1)**: p. 1-10.
9. Francis-Bacz, C., S. Wood-Dauphinee, and E. Gisel, *The Discriminative Validity of the McGill Ingestive Skills Assessment*. Physical & Occupational Therapy In Geriatrics, 2013. **31(2)**: p. 148-158.
10. González-Fernández, M., M.T. Sein, and J.B. Palmer, *Clinical experience using the Mann assessment of swallowing ability for identification of patients at risk for aspiration in a mixed-disease population*. American Journal of Speech-Language Pathology, 2011. **20(4)**: p. 331-336.
11. Huckabee, M.L., O. Apperley, and C. Lazarus, *Quantitative measurement of solid bolus ingestion in post-radiation head and neck cancer patients*. Dysphagia, 2018. **33(4)**: p. 530-531.
12. Hyun, S.E., Y.G. Yi, and H.-I. Shin, *Reliability and Validity of the Eating and Drinking Ability Classification System in Adults with Cerebral Palsy*. Dysphagia, 2021. **36(3)**: p. 351-361.
13. Ishii, M., et al., *Higher Activity and Quality of Life Correlates with Swallowing Function in Older Adults with Low Activities of Daily Living*. Gerontology, 2021: p. 1-9.
14. Ji, E.K., et al., *Is the modified Mann Assessment of Swallowing Ability useful for assessing dysphagia in patients with mild to moderate dementia?* Journal of Clinical Neuroscience, 2019. **70**: p. 169-172.
15. Karsten, R.T., et al., *The Timed Swallowing Proficiency for Eating and Drinking (SPEAD) Test: Development and Initial Validation of an Instrument to Objectify (Impaired) Swallowing Capacity in Head and Neck Cancer Patients*. Dysphagia, 2021. **36(6)**: p. 1072-1087.
16. Kothari, S., et al., *The Test of Masticating and Swallowing Solids (TOMASS): Reliability, Validity and Normative Data for the Adult Indian Population*. Indian Journal of Otolaryngology and Head & Neck Surgery, 2021. **73(3)**: p. 327-332.
17. Kwon, S., et al., *Assessment of Aspiration Risk Using the Mann Assessment of Swallowing Ability in Brain-Injured Patients With Cognitive Impairment*. Frontiers in Neurology, 2019. **10**: p. 1264.
18. Lambert, H.C., et al., *McGill Ingestive Skills Assessment (MISA): Development and first field test of an evaluation of functional ingestive skills of elderly persons*. Dysphagia, 2003. **18(2)**: p. 101-113.
19. Lambert, H.C., et al., *The McGill ingestive skills assessment predicts time to death in an elderly population with neurogenic dysphagia: preliminary evidence*. Dysphagia, 2005. **20(2)**: p. 123-32.
20. Lambert, H.C., et al., *Psychometric Testing of the McGill Ingestive Skills Assessment*. American Journal of Occupational Therapy, 2006. **60(4)**: p. 409-419.
21. McMicken, B.L. and C.L. Muzzy, *Functional outcomes of standard dysphagia treatment in first time documented stroke patients*. Disability and Rehabilitation, 2009. **31(10)**: p. 806-817.

22. McMicken, B.L. and C.L. Muzzy, *Prognostic indicators of functional outcomes in first time documented acute stroke patients following standard dysphagia treatment*. Disability and Rehabilitation, 2009. **31**(26): p. 2196-2203.
23. McMicken, B.L., C.L. Muzzy, and S. Calahan, *Retrospective ratings of 100 first time-documented stroke patients on the Functional Oral Intake Scale*. Disability and Rehabilitation, 2010. **32**(14): p. 1163-1172.
24. Mitani, Y., et al., *Relationship between the Functional Independence Measure and Mann Assessment of Swallowing Ability in hospitalized patients with pneumonia*. Geriatrics & Gerontology International, 2018. **18**(12): p. 1620-1624.
25. Nordio, S., et al., *The correlation between pharyngeal residue, penetration/aspiration and nutritional modality: a cross-sectional study in patients with neurogenic dysphagia*. Acta Otorhinolaryngologica Italica, 2020. **40**(1): p. 38-43.
26. Oliveira, A.R.d.S.-, et al., *Construction and validation of indicators and respective definitions for the nursing outcome Swallowing Status*. Revista Latino-Americana de Enfermagem, 2015. **23**(3): p. 450-457.
27. Oliveira-Kumakura, A.R.S., et al., *Clinical Validation of the Nursing Outcome "Swallowing Status" in People with Stroke: Analysis According to the Classical and Item Response Theories*. International Journal of Nursing Knowledge, 2018. **29**(4): p. 234-241.
28. Oliveira-Kumakura, A.R.S., J.B. Alonso, and E.C. de Carvalho, *Psychometric Assessment of the Nursing Outcome Swallowing Status: Rasch Model Approach*. International Journal of Nursing Knowledge, 2019. **30**(4): p. 197-202.
29. Sellers, D., et al., *Development of an Eating and Drinking Ability Classification System (EDACS) for people with cerebral palsy*. Developmental Medicine and Child Neurology, 2013. **2**: p. 49-50.
30. Sheppard, J.J., R. Hochman, and C. Baer, *The Dysphagia Disorder Survey: Validation of an assessment for swallowing and feeding function in developmental disability*. Research in Developmental Disabilities, 2014. **35**(5): p. 929-942.
31. Steele, C.M., et al., *Creation and Initial Validation of the International Dysphagia Diet Standardisation Initiative Functional Diet Scale*. Archives of Physical Medicine & Rehabilitation, 2018. **99**(5): p. 934-944.
32. Todaro, F., et al., *The test of masticating and swallowing solids (tomass): Reliability and validity in patients with dysphagia*. International Journal of Language & Communication Disorders, 2021. **56**(3): p. 558-566.
33. Uhm, K.E., et al., *The Easy Dysphagia Symptom Questionnaire (EDSQ): a new dysphagia screening questionnaire for the older adults*. European Geriatric Medicine, 2019. **10**(1): p. 47-52.
