# Supplementary material for: Reliability and Validity of Non-Instrumental Clinical Assessments for Adults with Oropharyngeal Dysphagia: A Systematic Review
Source: MDPI journal article supplement (doi:10.3390/jcm12020721), 2023-01-16
Supplement: s1 [file s1]

## Supplementary File S3. Reliability and Validity of Non-instrumental Clinical Assessments for Adults with Oropharyngeal Dysphagia: A systematic review.

Definitions of the nine measurement properties according to COSMIN [1, 2]

| DOMAIN                              | MEASUREMENT PROPERTY                                                                                                                                                                                                                    |
|-------------------------------------|-----------------------------------------------------------------------------------------------------------------------------------------------------------------------------------------------------------------------------------------|
| <b>RELIABILITY</b>                  | <b><i>Degree to which the measurement is free from measurement error</i></b>                                                                                                                                                            |
|                                     | 1) <b>Internal consistency</b> Degree of the interrelatedness among the items                                                                                                                                                           |
|                                     | 2) <b>Reliability</b> Proportion of the total variance in the measurements which is because of “true” differences between patients                                                                                                      |
|                                     | 3) <b>Measurement error</b> Systematic and random error of a patient’s score that is not attributed to true changes in the construct to be measured.                                                                                    |
| <b>VALIDITY</b>                     | <b><i>Degree to which an instrument measures the construct(s) it purports to measure</i></b>                                                                                                                                            |
|                                     | 4) <b>Content validity</b><br>Degree to which the content of an instrument is an adequate reflection of the construct to be measured                                                                                                    |
|                                     | 5) <b>Structural validity</b><br>Degree to which the scores of an instrument are an adequate reflection of the dimensionality of the construct to be measured                                                                           |
|                                     | 6) <b>Hypotheses testing</b><br>Idem construct validity                                                                                                                                                                                 |
|                                     | 7) <b>Cross-cultural validity</b><br>Degree to which the performance of the items on a translated or culturally adapted instrument are an adequate reflection of the performance of the items of the original version of the instrument |
|                                     | 8) <b>Criterion validity</b><br>Degree to which the scores of an instrument are an adequate reflection of a ‘gold standard’                                                                                                             |
| <b>RESPONSIVENESS</b>               | <b><i>Ability of an instrument to detect change over time in the construct to be measured</i></b>                                                                                                                                       |
|                                     | 9) <b>Responsiveness</b> Idem Responsiveness                                                                                                                                                                                            |
| <b>Interpretability<sup>a</sup></b> | <b><i>Degree to which one can assign qualitative meaning to an instrument’s quantitative scores or change in scores</i></b>                                                                                                             |

<sup>a</sup> Interpretability is not considered a psychometric property.

## References

1. Mokkink, L.B., et al., *COSMIN methodology for systematic reviews of patient-reported outcome measures (PROMs)*. User manual, 2018. **78**(1).
2. Mokkink, L.B., et al., *The COSMIN study reached international consensus on taxonomy, terminology, and definitions of measurement properties for health-related patient-reported outcomes*. Journal of clinical epidemiology, 2010. **63**(7): p. 737-745.
