# Supplementary material for: Reliability and Validity of Non-Instrumental Clinical Assessments for Adults with Oropharyngeal Dysphagia: A Systematic Review
Source: J Clin Med. 2023 Jan 16;12(2):721. doi: 10.3390/jcm12020721 (PMC9861493; doi:10.3390/jcm12020721)
Supplement: Supplementary file 1 [file jcm-12-00721-s001.zip]

Archive with 5 entries (5 files):
- Supplementary FileS1 PRISMA Abstract Checklist.pdf
- Supplementary FileS2 PRISMA Checklist.pdf
- Supplementary FileS3 COSMIN Definitions.pdf
- Supplementary FileS4 Excluded Measures.pdf
- Supplementary FileS5 Study Quality QualSyst.pdf
